# Supplementary material
Source: publisher site journal article supplement (https://www.dovepress.com/article/589009)
Supplement: Supplementary file 1 [file 589009%20Supplementary%20Material.docx]

**Supplementary Material**

**1. Decomposition analysis**

**2. Bayesian age-period-cohort (BAPC) Model**

**3. Supplementary Tables**

**Supplementary Table 1:** Number and age-standardized rate (ASR) of prevalence, deaths, and disability-adjusted life years (DALYs) for lower extremity peripheral arterial disease among postmenopausal women globally from 1990 to 2021, by year and sex.

**Supplementary Table 2:** Number and age-standardized rate (ASR) of prevalence, deaths, and disability-adjusted life years (DALYs) for lower extremity peripheral arterial disease among postmenopausal women globally in 2021, by age group and sex.

**Supplementary Table 3:** Changes in prevalent cases, deaths, and disability-adjusted life years (DALYs) of lower extremity peripheral arterial disease among postmenopausal women according to aging, population growth, and epidemiological change from 1990 to 2021 at 5 socio-demographic Index (SDI) regions and globally.

This supplemental material has been provided by the authors to give readers additional information about their work.

**1. Decomposition analysis**

Decomposition analysis was conducted to quantify the contributions of population growth, aging, and epidemiological changes to observed changes in LEPAD burden among postmenopausal women. It can provide quantitative insights into the specific causes that influence the changes in metric numbers over the defined time periods at the global, regional, and national levels. Changes in LEPAD burden were decomposed into population growth, aging, and epidemiological changes. The decomposition results include both the absolute and relative contributions of each factor. Absolute contribution represents the number of prevalence, deaths, or DALYs attributable to the disease, while relative contribution (i.e., the “attribution ratio”) is calculated by dividing the number of attributable prevalence, deaths, or DALYs by the total number of prevalence, deaths, or DALYs in 1990 and multiplying by 100%. This ratio may exceed 100% if the number of attributable deaths surpasses the total number of deaths in 1990. It is calculated by the following formula:

( represents prevalence, deaths, or DALYs number accumulated by population growth, aging, and epidemiological changes in year t, is the proportion of population for the age group k at year t, is the population size at year t, and is represented by deaths or DALYs rate for a specific age group k at year t).

**2. Bayesian age-period-cohort (BAPC) Model**

**2.1** **Model Establishment and Assumptions**

We employed the BAPC model to project future LEPAD burdens among postmenopausal women by 2035. It builds on the traditional generalized linear model framework within a Bayesian context, allowing the dynamic integration of age, period, and cohort effects. These effects are assumed to evolve continuously over time and are smoothed using a second-order random walk, resulting in more accurate posterior probability predictions. The Integrated Nested Laplace Approximation (INLA) framework was utilized alongside the BAPC model to approximate the marginal posterior distributions, effectively avoiding the mixing and convergence issues associated with conventional Bayesian methods that rely on Markov chain Monte Carlo sampling techniques. The model’s flexibility and robustness in handling time series data make it particularly suitable for long-term disease burden predictions. Therefore, we used the BAPC model implemented within the INLA framework. This approach enables nuanced predictions of future disease burdens while considering the intricate interactions of age, period, and cohort effects. In this study, we implemented the BAPC model in R (version 4.4.2) using the BAPC package and INLA package, leveraging GBD 2021 data and Institute for Health Metrics and Evaluation (IHME) population projections.

**2.2 Parameter Selection**

The selection of model parameters was guided by the principle of parsimony while ensuring the model adequately captured the complex temporal and demographic trends. The model includes random effects for age, period, and cohort to account for non-linear trends. The choice of the BAPC model over other alternatives like Generalized Additive Models or Smoothed Spline Models was based on its superior performance in predicting short-term and medium-term disease burdens. This model's ability to simultaneously analyze age-related changes, temporal trends (period effects), and generational differences (cohort effects) makes it particularly well-suited for projecting long-term disease trajectories. The use of the Bayesian framework also allowed for the incorporation of prior knowledge and provided credible intervals for all projections, which are essential for robust forecasting.

**2.3 Training and Fitting** **Process**

Using age-stratified LEPAD data from the GBD 2021 database, we structured the input as a three-dimensional array (age group × period × sex). Bayesian inference was implemented via the INLA package in R, which employs integrated nested Laplace approximation to estimate posterior marginal distributions of parameters. The computational framework specifies:

Where *τ=1/σ2* denotes precision parameters, with gamma hyperpriors (*Γ* (0.001,0.001)) controlling the smoothness of random walks. Compared to conventional MCMC simulation, this approach offers superior computational efficiency, avoids convergence diagnostics, and quantifies uncertainty for all parameters through posterior distributions (e.g., 95% credible intervals for age effects *αa*).

**Supplementary Table 1:** Number and age-standardized rate (ASR) of prevalence, deaths, and disability-adjusted life years (DALYs) for lower extremity peripheral arterial disease among postmenopausal women globally from 1990 to 2021, by year and sex.

| **Year** | **Prevalence** | | **Deaths** | | **DALYs** | |
| --- | --- | --- | --- | --- | --- | --- |
| **Male** | **Female** | **Male** | **Female** | **Male** | **Female** |
| **Number (95% UI)** | | | | | | |
| 1990 | 14935890 (12740664, 17583842) | 33223176 (28592718, 38764628) | 18399 (16929, 20111) | 19577 (17249, 21333) | 409101 (350630, 491347) | 449141 (352024, 627374) |
| 1991 | 15234329 (13012487, 17920170) | 33846181 (29136437, 39493255) | 18884 (17444, 20570) | 20231 (17864, 21981) | 419048 (361856, 501550) | 460260 (361910, 642234) |
| 1992 | 15530928 (13283748, 18256458) | 34456867 (29670694, 40195412) | 19773 (18391, 21424) | 21118 (18643, 22910) | 437664 (379555, 521932) | 474543 (375315, 657909) |
| 1993 | 15826860 (13555690, 18591482) | 35056675 (30192541, 40887041) | 21032 (19669, 22572) | 22058 (19714, 23567) | 465150 (407181, 546588) | 490629 (388887, 673388) |
| 1994 | 16125659 (13831412, 18930879) | 35648805 (30696804, 41573727) | 21746 (20408, 23274) | 22894 (20361, 24447) | 481658 (423964, 564794) | 504445 (399263, 691532) |
| 1995 | 16443687 (14118838, 19295992) | 36266303 (31217053, 42291764) | 21839 (20484, 23347) | 23256 (20704, 24895) | 484379 (426382, 570019) | 512262 (405726, 702210) |
| 1996 | 16765858 (14407292, 19665165) | 36882136 (31754687, 42970044) | 21938 (20555, 23461) | 23684 (21037, 25377) | 485515 (426432, 576073) | 519774 (412034, 712732) |
| 1997 | 17079936 (14688704, 20024052) | 37484307 (32286824, 43647698) | 22143 (20698, 23730) | 24193 (21411, 25969) | 488901 (430170, 581193) | 529787 (420615, 725910) |
| 1998 | 17403073 (14979566, 20392628) | 38087156 (32830353, 44333005) | 22900 (21415, 24578) | 25059 (22124, 26944) | 501936 (441815, 595279) | 543322 (433176, 742621) |
| 1999 | 17729695 (15282206, 20751746) | 38694928 (33353012, 45025557) | 23856 (22337, 25523) | 26120 (23031, 27916) | 520352 (458328, 616800) | 559533 (446996, 762418) |
| 2000 | 18070713 (15611802, 21127935) | 39330358 (33907095, 45785543) | 24510 (22977, 26186) | 26832 (23607, 28775) | 531558 (468888, 628609) | 570537 (455680, 776526) |
| 2001 | 18439202 (15946138, 21547530) | 40013968 (34515660, 46567557) | 24084 (22525, 25775) | 26182 (22948, 28161) | 522644 (459616, 619842) | 562894 (446678, 772362) |
| 2002 | 18861751 (16329458, 22029007) | 40768060 (35197928, 47400686) | 24532 (22953, 26239) | 26644 (23261, 28675) | 530397 (466441, 629645) | 571480 (452423, 784517) |
| 2003 | 19297721 (16717192, 22535610) | 41516165 (35876495, 48262694) | 24824 (23211, 26614) | 26968 (23450, 29005) | 536614 (472240, 636954) | 578251 (457141, 793321) |
| 2004 | 19774379 (17135258, 23086500) | 42366563 (36640884, 49244623) | 24708 (23050, 26527) | 27135 (23681, 29303) | 535261 (468790, 635867) | 583291 (460559, 800981) |
| 2005 | 20247432 (17547444, 23633334) | 43225432 (37425516, 50239149) | 25077 (23412, 26913) | 27230 (23741, 29355) | 543081 (477092, 647020) | 588077 (463046, 808700) |
| 2006 | 20771084 (18020781, 24223410) | 44238022 (38364195, 51374397) | 24826 (23119, 26684) | 27017 (23461, 29224) | 537737 (470667, 643208) | 587642 (460783, 812158) |
| 2007 | 21326563 (18525953, 24841548) | 45335939 (39363247, 52588004) | 24936 (23177, 26872) | 27521 (23814, 29768) | 540154 (471579, 647495) | 596639 (466375, 825787) |
| 2008 | 21906977 (19076174, 25485728) | 46478021 (40399053, 53857701) | 25686 (23870, 27647) | 28167 (24347, 30447) | 553925 (483081, 663482) | 609119 (474654, 842413) |
| 2009 | 22526410 (19659632, 26163587) | 47692165 (41487787, 55252076) | 26205 (24242, 28289) | 28985 (25048, 31449) | 563092 (489793, 678436) | 623106 (486392, 859451) |
| 2010 | 23177615 (20265355, 26860609) | 48931636 (42590573, 56680557) | 27347 (25324, 29500) | 29852 (25699, 32390) | 584262 (509597, 700904) | 638215 (499115, 878688) |
| 2011 | 23847385 (20849864, 27635772) | 50189180 (43712979, 58113036) | 27492 (25376, 29806) | 30497 (26136, 33304) | 587927 (512135, 708031) | 651164 (508886, 895127) |
| 2012 | 24532958 (21446835, 28433458) | 51448131 (44847228, 59552766) | 27991 (25818, 30404) | 30796 (26351, 33518) | 597094 (518244, 720588) | 659490 (514490, 908268) |
| 2013 | 25222833 (22046529, 29238066) | 52696770 (45978060, 60982379) | 28509 (26263, 30987) | 31513 (26946, 34341) | 607187 (529237, 734469) | 673931 (525963, 927973) |
| 2014 | 25932043 (22659184, 30069899) | 54019895 (47175251, 62487089) | 28973 (26640, 31698) | 31975 (27366, 34985) | 618181 (537072, 748736) | 685409 (534337, 945314) |
| 2015 | 26677481 (23302837, 30938900) | 55434438 (48451587, 64102765) | 28660 (26372, 31368) | 31008 (26493, 33820) | 616723 (535420, 754868) | 680268 (525235, 947115) |
| 2016 | 27511003 (24031199, 31935495) | 57067162 (49826099, 65982832) | 29530 (27116, 32400) | 31615 (27095, 34716) | 636481 (551561, 776917) | 696297 (536781, 970276) |
| 2017 | 28443515 (24829050, 33060997) | 58907246 (51353933, 68085447) | 29858 (27424, 32803) | 31643 (26996, 34787) | 646042 (557885, 788201) | 706017 (541619, 989108) |
| 2018 | 29432060 (25666218, 34260888) | 60846140 (52976962, 70317004) | 30702 (28175, 33823) | 32249 (27494, 35478) | 664247 (571963, 811337) | 723615 (555084, 1018848) |
| 2019 | 30433111 (26507650, 35479524) | 62810014 (54600613, 72594195) | 31271 (28680, 34804) | 32733 (27828, 36105) | 678036 (582325, 831412) | 739789 (565866, 1048326) |
| 2020 | 31311846 (27175492, 36585286) | 64409998 (55963804, 74595473) | 31833 (29156, 36119) | 33512 (28356, 37432) | 690313 (587889, 849697) | 760860 (571784, 1083738) |
| 2021 | 32401715 (28081493, 37902741) | 66392811 (57438568, 77161304) | 32120 (29373, 36330) | 33854 (28536, 37915) | 700621 (600495, 865063) | 777299 (584993, 1107794) |
| **ASR per 100000 (95% UI)** | | | | | | |
| 1990 | 4795.08 (4090.32, 5645.19) | 9230.14 (7943.70, 10769.68) | 5.91 (5.44, 6.46) | 5.44 (4.79, 5.93) | 131.34 (112.57, 157.74) | 124.78 (97.80, 174.30) |
| 1991 | 4775.42 (4078.95, 5617.33) | 9207.23 (7926.03, 10743.41) | 5.92 (5.47, 6.45) | 5.50 (4.86, 5.98) | 131.36 (113.43, 157.22) | 125.21 (98.45, 174.71) |
| 1992 | 4756.83 (4068.56, 5591.61) | 9179.41 (7904.36, 10708.18) | 6.06 (5.63, 6.56) | 5.63 (4.97, 6.10) | 134.05 (116.25, 159.86) | 126.42 (99.99, 175.27) |
| 1993 | 4742.15 (4061.65, 5570.51) | 9152.24 (7882.36, 10674.37) | 6.30 (5.89, 6.76) | 5.76 (5.15, 6.15) | 139.37 (122.00, 163.77) | 128.09 (101.53, 175.80) |
| 1994 | 4732.88 (4059.52, 5556.22) | 9130.62 (7862.28, 10648.16) | 6.38 (5.99, 6.83) | 5.86 (5.22, 6.26) | 141.37 (124.43, 165.77) | 129.20 (102.26, 177.12) |
| 1995 | 4731.49 (4062.54, 5552.21) | 9114.91 (7845.87, 10629.30) | 6.28 (5.89, 6.72) | 5.84 (5.20, 6.26) | 139.37 (122.69, 164.02) | 128.75 (101.97, 176.49) |
| 1996 | 4732.10 (4066.41, 5550.42) | 9100.65 (7835.45, 10602.84) | 6.19 (5.80, 6.62) | 5.84 (5.19, 6.26) | 137.04 (120.36, 162.59) | 128.25 (101.67, 175.87) |
| 1997 | 4732.78 (4070.18, 5548.58) | 9085.70 (7825.90, 10579.63) | 6.14 (5.74, 6.58) | 5.86 (5.19, 6.29) | 135.47 (119.20, 161.05) | 128.41 (101.95, 175.95) |
| 1998 | 4736.32 (4076.75, 5549.94) | 9075.43 (7822.83, 10563.69) | 6.23 (5.83, 6.69) | 5.97 (5.27, 6.42) | 136.60 (120.24, 162.01) | 129.46 (103.22, 176.95) |
| 1999 | 4740.76 (4086.33, 5548.83) | 9065.35 (7813.86, 10548.47) | 6.38 (5.97, 6.82) | 6.12 (5.40, 6.54) | 139.14 (122.55, 164.93) | 131.09 (104.72, 178.62) |
| 2000 | 4747.49 (4101.49, 5550.67) | 9060.13 (7810.83, 10547.15) | 6.44 (6.04, 6.88) | 6.18 (5.44, 6.63) | 139.65 (123.18, 165.15) | 131.43 (104.97, 178.88) |
| 2001 | 4747.68 (4105.77, 5548.00) | 9041.49 (7799.10, 10522.33) | 6.20 (5.80, 6.64) | 5.92 (5.19, 6.36) | 134.57 (118.34, 159.60) | 127.19 (100.93, 174.52) |
| 2002 | 4733.91 (4098.35, 5528.82) | 8992.60 (7763.95, 10455.63) | 6.16 (5.76, 6.59) | 5.88 (5.13, 6.33) | 133.12 (117.07, 158.03) | 126.06 (99.80, 173.05) |
| 2003 | 4720.27 (4089.07, 5512.27) | 8940.23 (7725.77, 10393.05) | 6.07 (5.68, 6.51) | 5.81 (5.05, 6.25) | 131.26 (115.51, 155.80) | 124.52 (98.44, 170.84) |
| 2004 | 4695.95 (4069.22, 5482.50) | 8875.81 (7676.28, 10316.77) | 5.87 (5.47, 6.30) | 5.68 (4.96, 6.14) | 127.11 (111.33, 151.00) | 122.20 (96.49, 167.81) |
| 2005 | 4683.80 (4059.22, 5467.06) | 8829.59 (7644.85, 10262.27) | 5.80 (5.42, 6.23) | 5.56 (4.85, 6.00) | 125.63 (110.36, 149.67) | 120.13 (94.59, 165.19) |
| 2006 | 4658.95 (4042.06, 5433.31) | 8773.11 (7608.24, 10188.37) | 5.57 (5.19, 5.99) | 5.36 (4.65, 5.80) | 120.61 (105.57, 144.27) | 116.54 (91.38, 161.06) |
| 2007 | 4636.19 (4027.37, 5400.32) | 8724.89 (7575.45, 10120.55) | 5.42 (5.04, 5.84) | 5.30 (4.58, 5.73) | 117.42 (102.52, 140.76) | 114.82 (89.75, 158.92) |
| 2008 | 4613.00 (4016.91, 5366.59) | 8674.34 (7539.80, 10051.63) | 5.41 (5.03, 5.82) | 5.26 (4.54, 5.68) | 116.64 (101.72, 139.71) | 113.68 (88.59, 157.22) |
| 2009 | 4591.81 (4007.44, 5333.21) | 8626.13 (7503.94, 9993.50) | 5.34 (4.94, 5.77) | 5.24 (4.53, 5.69) | 114.78 (99.84, 138.29) | 112.70 (87.97, 155.45) |
| 2010 | 4572.44 (3997.92, 5299.02) | 8573.49 (7462.45, 9931.21) | 5.39 (5.00, 5.82) | 5.23 (4.50, 5.68) | 115.26 (100.53, 138.27) | 111.82 (87.45, 153.96) |
| 2011 | 4558.34 (3985.38, 5282.48) | 8527.08 (7426.78, 9873.33) | 5.26 (4.85, 5.70) | 5.18 (4.44, 5.66) | 112.38 (97.89, 135.34) | 110.63 (86.46, 152.08) |
| 2012 | 4549.43 (3977.13, 5272.74) | 8486.50 (7397.66, 9823.38) | 5.19 (4.79, 5.64) | 5.08 (4.35, 5.53) | 110.73 (96.10, 133.63) | 108.78 (84.87, 149.82) |
| 2013 | 4544.15 (3971.91, 5267.54) | 8449.82 (7372.49, 9778.40) | 5.14 (4.73, 5.58) | 5.05 (4.32, 5.51) | 109.39 (95.35, 132.32) | 108.06 (84.34, 148.80) |
| 2014 | 4543.02 (3969.65, 5267.93) | 8425.38 (7357.84, 9746.00) | 5.08 (4.67, 5.55) | 4.99 (4.27, 5.46) | 108.30 (94.09, 131.17) | 106.90 (83.34, 147.44) |
| 2015 | 4543.91 (3969.12, 5269.75) | 8407.76 (7348.67, 9722.49) | 4.88 (4.49, 5.34) | 4.70 (4.02, 5.13) | 105.05 (91.20, 128.57) | 103.18 (79.66, 143.65) |
| 2016 | 4553.15 (3977.24, 5285.42) | 8412.08 (7344.69, 9726.30) | 4.89 (4.49, 5.36) | 4.66 (3.99, 5.12) | 105.34 (91.28, 128.58) | 102.64 (79.13, 143.03) |
| 2017 | 4569.25 (3988.61, 5311.02) | 8431.37 (7350.27, 9745.04) | 4.80 (4.41, 5.27) | 4.53 (3.86, 4.98) | 103.78 (89.62, 126.62) | 101.05 (77.52, 141.57) |
| 2018 | 4582.74 (3996.38, 5334.61) | 8444.93 (7352.75, 9759.40) | 4.78 (4.39, 5.27) | 4.48 (3.82, 4.92) | 103.43 (89.06, 126.33) | 100.43 (77.04, 141.41) |
| 2019 | 4591.75 (3999.48, 5353.15) | 8450.75 (7346.22, 9767.16) | 4.72 (4.33, 5.25) | 4.40 (3.74, 4.86) | 102.30 (87.86, 125.44) | 99.53 (76.13, 141.05) |
| 2020 | 4588.60 (3982.44, 5361.40) | 8412.62 (7309.46, 9742.95) | 4.66 (4.27, 5.29) | 4.38 (3.70, 4.89) | 101.16 (86.15, 124.52) | 99.38 (74.68, 141.55) |
| 2021 | 4632.01 (4014.41, 5418.41) | 8441.89 (7303.35, 9811.11) | 4.59 (4.20, 5.19) | 4.30 (3.63, 4.82) | 100.16 (85.84, 123.67) | 98.83 (74.38, 140.86) |

**Supplementary Table 2:** Number and age-standardized rate (ASR) of prevalence, deaths, and disability-adjusted life years (DALYs) for lower extremity peripheral arterial disease among postmenopausal women globally in 2021, by age group and sex.

| **Age** | **Prevalence** | | **Deaths** | | **DALYs** | |
| --- | --- | --- | --- | --- | --- | --- |
| **Male** | **Female** | **Male** | **Female** | **Male** | **Female** |
| **Number (95% UI)** | | | | | | |
| 55-59 years | 3950610 (4863187, 3151129) | 7320430 (9122925, 5871699) | 1401 (1727, 1280) | 643 (748, 550) | 58003 (71843, 49737) | 39812 (58773, 28863) |
| 60-64 years | 4822501 (6037334, 3827087) | 8562007 (10709455, 6851849) | 2550 (3052, 2320) | 1113 (1267, 963) | 94328 (119240, 80218) | 65926 (99414, 46235) |
| 65-69 years | 5965647 (7357658, 4890642) | 11103784 (13656557, 8972942) | 3681 (4218, 3403) | 1748 (1972, 1552) | 121545 (160656, 100797) | 99588 (163451, 66815) |
| 70-74 years | 6123885 (7457126, 4947211) | 11731907 (14361040, 9425980) | 4643 (5460, 4278) | 2695 (3029, 2343) | 128600 (169703, 105543) | 121716 (196072, 81409) |
| 75-79 years | 4858978 (5837078, 4024022) | 9897548 (11849946, 8178396) | 4715 (5429, 4327) | 3563 (3937, 3131) | 103730 (131200, 86056) | 116067 (168378, 82324) |
| 80-84 years | 3631620 (4357820, 3000245) | 8576780 (10248754, 7126876) | 5515 (6118, 5025) | 6055 (6748, 5142) | 89298 (107950, 75202) | 124360 (166813, 93485) |
| 85-89 years | 2025710 (2424216, 1663636) | 5585285 (6684092, 4625846) | 5062 (5668, 4418) | 7130 (8120, 5779) | 60681 (71067, 51935) | 98905 (126908, 76444) |
| 90-94 years | 795199 (947883, 656427) | 2669562 (3178209, 2205498) | 3273 (3599, 2740) | 6650 (7497, 5081) | 32575 (37492, 27174) | 71012 (85821, 55264) |
| 95+ years | 227565 (269722, 186723) | 945508 (1119796, 780689) | 1280 (1440, 1000) | 4258 (4893, 3040) | 11859 (13709, 9483) | 39915 (47237, 29530) |
| **ASR per 100000 (95% UI)** | | | | | | |
| 55-59 years | 2028.82 (2497.47, 1618.25) | 3641.94 (4538.69, 2921.19) | 0.72 (0.89, 0.66) | 0.32 (0.37, 0.27) | 29.79 (36.89, 25.54) | 19.81 (29.24, 14.36) |
| 60-64 years | 3100.55 (3881.61, 2460.57) | 5204.52 (6509.87, 4164.98) | 1.64 (1.96, 1.49) | 0.68 (0.77, 0.59) | 60.65 (76.66, 51.58) | 40.07 (60.43, 28.1) |
| 65-69 years | 4525.15 (5581.03, 3709.72) | 7710.48 (9483.13, 6230.82) | 2.79 (3.2, 2.58) | 1.21 (1.37, 1.08) | 92.2 (121.86, 76.46) | 69.15 (113.5, 46.4) |
| 70-74 years | 6353.14 (7736.3, 5132.42) | 10719.18 (13121.36, 8612.31) | 4.82 (5.66, 4.44) | 2.46 (2.77, 2.14) | 133.41 (176.06, 109.49) | 111.21 (179.15, 74.38) |
| 75-79 years | 8127.19 (9763.17, 6730.63) | 13727.97 (16435.96, 11343.49) | 7.89 (9.08, 7.24) | 4.94 (5.46, 4.34) | 173.5 (219.45, 143.94) | 160.99 (233.54, 114.18) |
| 80-84 years | 9908.42 (11889.76, 8185.79) | 16839.93 (20122.74, 13993.14) | 15.05 (16.69, 13.71) | 11.89 (13.25, 10.1) | 243.64 (294.53, 205.18) | 244.17 (327.53, 183.55) |
| 85-89 years | 11741.43 (14051.26, 9642.78) | 19618.74 (23478.39, 16248.64) | 29.34 (32.85, 25.61) | 25.04 (28.52, 20.3) | 351.72 (411.92, 301.02) | 347.41 (445.77, 268.52) |
| 90-94 years | 13643.29 (16262.91, 11262.37) | 22134.06 (26351.4, 18286.39) | 56.16 (61.75, 47.02) | 55.14 (62.16, 42.13) | 558.9 (643.25, 466.23) | 588.78 (711.57, 458.21) |
| 95+ years | 15050.21 (17838.29, 12349.07) | 24008.22 (28433.73, 19823.16) | 84.66 (95.24, 66.14) | 108.12 (124.25, 77.2) | 784.32 (906.62, 627.19) | 1013.52 (1199.44, 749.82) |

**Supplementary Table 3:** Changes in prevalent cases, deaths, and disability-adjusted life years (DALYs) of lower extremity peripheral arterial disease among postmenopausal women according to aging, population growth, and epidemiological change from 1990 to 2021 at 5 socio-demographic Index (SDI) regions and globally.

| **Location** | **Overall difference** | **Aging** | **Population growth** | **Epidemiological change** | **Aging Percentage (%)** | **Population growth Percentage (%)** | **Epidemiological change Percentage (%)** |
| --- | --- | --- | --- | --- | --- | --- | --- |
| **Prevalent cases** | | | | | | | |
| Global | 33169635 | 1898093 | 37742693 | -6471151 | 5.72 | 113.79 | -19.51 |
| High SDI | 6989542 | 913504 | 10385540 | -4309502 | 13.07 | 148.59 | -61.66 |
| High-middle SDI | 8738530 | 596563 | 8263967 | -122000 | 6.83 | 94.57 | -1.4 |
| Middle SDI | 11924558 | 500454 | 11259978 | 164126 | 4.2 | 94.43 | 1.38 |
| Low-middle SDI | 4432963 | 229446 | 3992425 | 211093 | 5.18 | 90.06 | 4.76 |
| Low SDI | 1063162 | 33659 | 957847 | 71656 | 3.17 | 90.09 | 6.74 |
| **Deaths** | | | | | | | |
| Global | 14277 | 6365 | 21113 | -13201 | 44.58 | 147.88 | -92.47 |
| High SDI | 7951 | 3880 | 7487 | -3415 | 48.79 | 94.16 | -42.96 |
| High-middle SDI | 1791 | 2643 | 6375 | -7227 | 147.57 | 356.02 | -403.59 |
| Middle SDI | 2475 | 542 | 2071 | -138 | 21.9 | 83.68 | -5.58 |
| Low-middle SDI | 1366 | 162 | 824 | 381 | 11.86 | 60.27 | 27.88 |
| Low SDI | 649 | 53 | 412 | 183 | 8.21 | 63.58 | 28.21 |
| **DALYs** | | | | | | | |
| Global | 328159 | 64904 | 480114 | -216859 | 19.78 | 146.31 | -66.08 |
| High SDI | 113916 | 36369 | 140462 | -62915 | 31.93 | 123.3 | -55.23 |
| High-middle SDI | 53283 | 26913 | 131861 | -105491 | 50.51 | 247.47 | -197.98 |
| Middle SDI | 98519 | 9130 | 98728 | -9339 | 9.27 | 100.21 | -9.48 |
| Low-middle SDI | 45274 | 3498 | 36829 | 4947 | 7.73 | 81.35 | 10.93 |
| Low SDI | 16521 | 797 | 12849 | 2875 | 4.83 | 77.77 | 17.4 |
